# Supplementary material
Source: PubMed Central journal article supplement (PMC10256680)
Supplement: 41467_2023_39090_MOESM1_ESM.pdf [file 41467_2023_39090_MOESM1_ESM.pdf]

# **Intranasal or airborne transmission-mediated delivery of an attenuated SARS-CoV-2 protects Syrian hamsters against new variants**

**Authors:** Charles B. Stauff<sup>1,†</sup>, Prabhuanand Selvaraj<sup>1,†</sup>, Felice D'Agnillo<sup>2,†</sup>, Clement A. Meseda<sup>1,†</sup>, Shufeng Liu<sup>1</sup>, Cyntia L. Pedro<sup>1</sup>, Kotou Sangare<sup>1</sup>, Christopher Z. Lien<sup>1</sup>, Jerry P. Weir<sup>1</sup>, Matthew F. Starost<sup>3</sup>, Tony T. Wang<sup>1\*</sup>

## **Affiliations:**

<sup>1</sup>Division of Viral Products, Center for Biologics Evaluation and Research, Food and Drug Administration, Silver Spring, Maryland, USA.

<sup>2</sup>Laboratory of Biochemistry and Vascular Biology, Center for Biologics Evaluation and Research, Food and Drug Administration, Silver Spring, MD, USA.

<sup>3</sup>Division of Veterinary Resources, Diagnostic and Research Services Branch, National Institutes of Health, Rockville Pike, USA.

\*Email: [Tony.Wang@fda.hhs.gov](mailto:Tony.Wang@fda.hhs.gov)

Supplementary Materials

Supplementary figures

Fig. S1

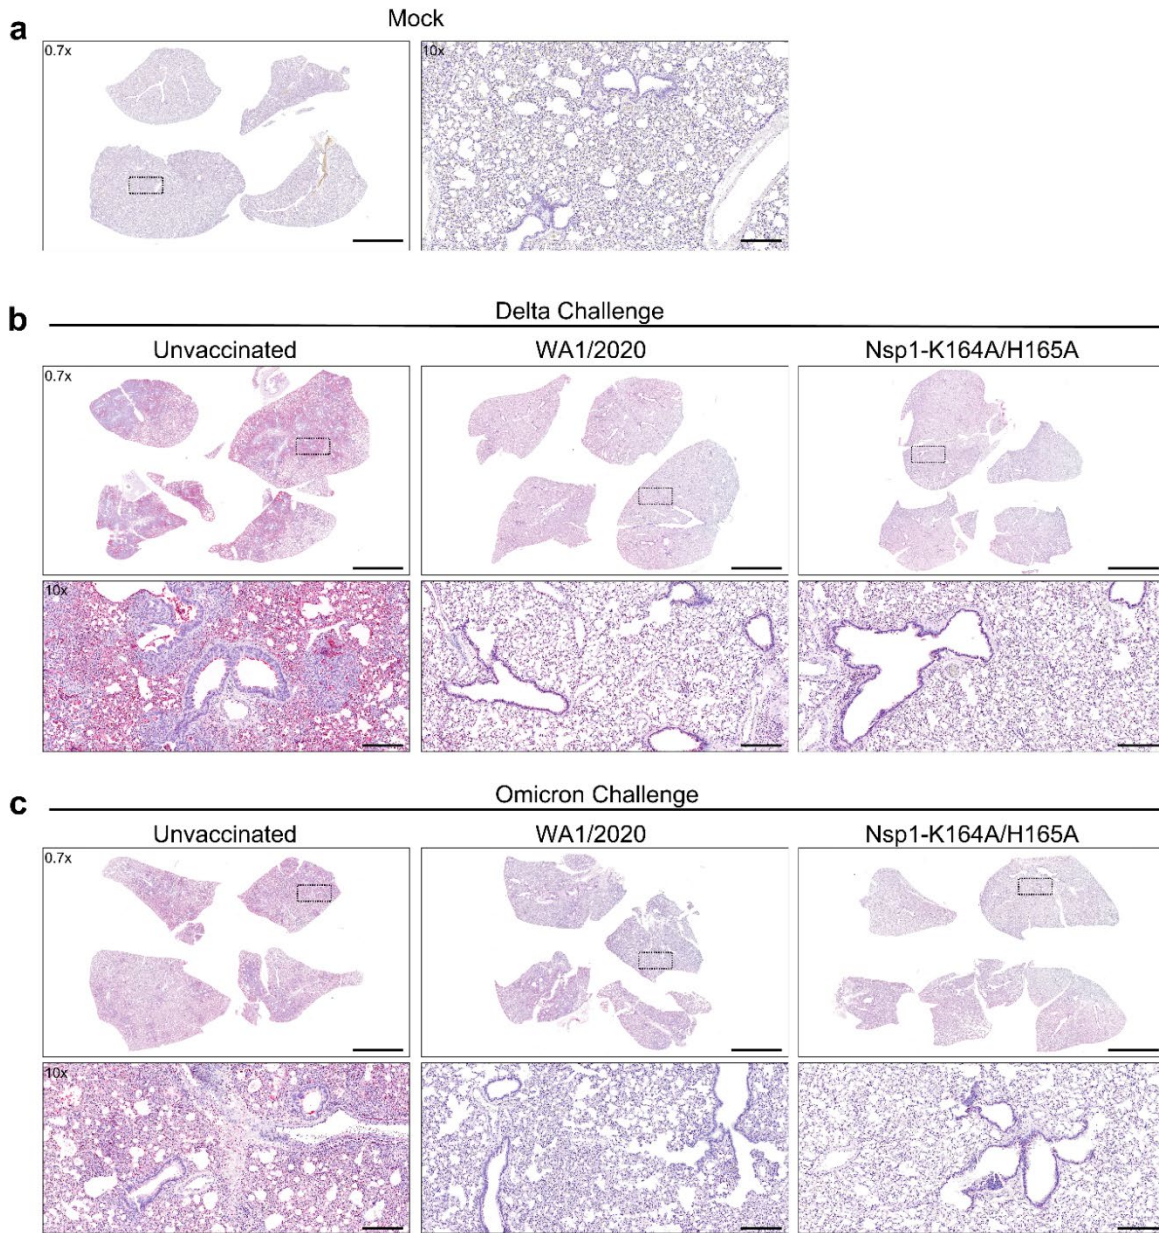

**Fig. S1: Nsp1-K164A/H165A protects against TUNEL-positive cell death in hamster lungs post-challenge with Delta and Omicron isolates**

Syrian hamsters were vaccinated with Nsp1-K164A/H165A or WA1/2020 35 days prior to challenge with Delta or BA.1 Omicron isolates on day 0. TUNEL reactivity (magenta staining) was examined in lung sections from (a) non-infected non-vaccinated hamsters (mock) or

following challenge with **(b)** Delta or **(c)** Omicron at 7 dpi (n = 3 hamsters per group). Nuclei were counterstained with hematoxylin. Black boxes indicate the regions of magnification. Scale bars: 5 mm (0.7x), 250 mm (10x).
